# Supplementary material for: Investigation of lipolytic activity of the red king crab hepatopancreas homogenate by NMR spectroscopy
Source: PeerJ. 2022 Jan 3;10:e12742. doi: 10.7717/peerj.12742 (PMC8734460; doi:10.7717/peerj.12742)
Supplement: Supplemental Information 9 [file peerj-10-12742-s009.xlsx]

## Sheet: tab
	mm210215
№	Compounds	Chemical shift and multiplicity [proton(s)]	NMR spectra
	TSP	0.000 s [-Si(CH3)3]	1D
1	TA	2.1236 s [2'CH3]; 2.1379 s [2''CH3]; 4.3045 dd [1b,3bCH2]; 4.3603 dd [1a,3aCH2]; 5.3145 m [2CH]	1D+2D(COSY)
2	1,2-DA	3.775 m [3CH2]; 4.245 dd [1bCH2]; 4.341 dd [1aCH2]; 5.134 m [2CH]	1D+2D(COSY)
3	2-MA	3.740 m [1,3CH2]; 4.971 m [2CH]	1D+2D(COSY)
4	1-MA	3.616 dd [3bCH2]; 3.665 dd [3aCH2]; 3.972 m [2CH]; 4.105 dd [1bCH2]; 4.205 dd [1aCH2]	1D+2D(COSY)
5	TGKK	0.8828 t [n'CH3]; 1.295 m [4'-n'CH2]; 1.584 t [3'CH2]; 2.252 t [2'CH2]; 4.0995 dd [1b,3bCH2]; 4.2842 dd [1a,3aCH2]; 5.2159 m [2CH]	1D+2D(COSY)
6	KK	0.8828 t [n'CH3]; 1.295 m [4'-n'CH2]; 1.584 t [3'CH2]; 2.1754 t [2'CH2]	1D+2D(COSY)

## Sheet: №№
mm210215
			Triacetin+HPC
data	time	t, min	№ sp.	t, min	t, h	coef.
2021-02-26	19-03	15	34	0	0	16
2021-02-26	19-25	15	35	29.5	0.491667	16
2021-02-26	22	15	36	44.5	0.741667	16
2021-02-26		15	37	59.5	0.991667	16
2021-02-26		15	38	74.5	1.24167	16
2021-02-26		30	39	97	1.61667	8
2021-02-26		30	40	127	2.11667	8
2021-02-26		60	41	172	2.86667	4
2021-02-26		60	42	232	3.86667	4
2021-02-26		120	43	322	5.36667	2
2021-02-26		120	44	442	7.36667	2
2021-02-27		240	45	622	10.3667	1
2021-02-27		240	46	862	14.3667	1
2021-02-27		240	47	1102	18.3667	1
2021-02-27		240	48	1342	22.3667	1
2021-02-27		240	49	1582	26.3667	1
2021-02-27		240	50	1822	30.3667	1
2021-02-27		240	51	2062	34.3667	1
2021-02-27		240	52	2302	38.3667	1
COSY		240	53	2542	42.3667
2021-02-28		240	54	2782	46.3667	1
COSY		240	55	3022	50.3667
2021-03-01		240	56	3262	54.3667	1
2021-03-01		240	57	3502	58.3667	1
			Triacetin+HPC#
data	time	t, min	№ sp.	t, min	t, h	coef.
2021-03-19	16-40	15	93	0	0	16
2021-03-19	17-01	30	95	36	0.6	8
2021-03-19	17-35	240	96	175	2.91667	1
2021-03-19	55	240	97	415	6.91667	1
2021-03-20		240	98	655	10.9167	1
2021-03-20		240	99	895	14.9167	1
2021-03-20		240	100	1135	18.9167	1
2021-03-20		240	101	1375	22.9167	1
2021-03-20		240	102	1615	26.9167	1
2021-03-20		240	103	1855	30.9167	1
2021-03-21		240	104	2095	34.9167	1
COSY		240	105	2335	38.9167	1

## Sheet: I_C
mm210215
		TA, mg	27.1
Triacetin+HPC		H2O, mg	1296.2
		TA+H2O, mg	524.3
		TSP, mg	71.7
		HPC, mg	17.2
		TSP, mkM/g	3.3156
		TSP, mkM	0.237729
		Σm	613.2
		TSP, mkM/g	0.387685
		Integrals
	ppm	5.3033	5.1037	4.966	3.9723	2.1351	1.9595	0			ppm	5.3033	5.1037	4.966	3.9723	2.1351	1.9595	0		5.3033	5.1037	4.966	3.9723	2.1351	1.9595		5.3033	5.1037	4.966	3.9723	1.9595					5.3033	5.1037	4.966	3.9723
	H	1	1	1	1	3	3	9				I rel.								C*, mkM/g							C, mkM/g									C, %
№ sp.	№	TA	1,2-DA	2-MA	1-MA	Ac(A)	Ac	TSP		t, min	t, h	TA	1,2-DA	2-MA	1-MA	Ac(A)	Ac	TSP		TA	1,2-DA	2-MA	1-MA	Ac(A)	Ac		TA	1,2-DA	2-MA	1-MA	Ac		Ac(Σ)	k(/)Ac		TA	1,2-DA	2-MA	1-MA
34	1	724034772	473798	-	-	6385308312	2802051	32633086		0	0	199.684	0.130671	-	-	587.009	0.257596	1		77.4146	0.050659	0	0	227.575	0.0998661		77.4146	0.050659	0	0	0.050659		0.050659	1		99.9346	0.0653958	0	0
35	2	717736159	4371185	-	-	6381984974	31290319	32803161		29.5	0.491667	196.921	1.19929	-	-	583.662	2.86164	1		76.3433	0.464949	0	0	226.277	1.10942		76.4051	1.06021	0	0	1.06021		0.464949	2.28027		98.6314	1.36863	0	0
36	3	712479032	6217691	-	-	6367282620	47993701	32804110		44.5	0.741667	195.473	1.70586	-	-	582.3	4.38912	1		75.7819	0.661337	0	0	225.749	1.7016		75.8129	1.65239	0	0	1.65239		0.661337	2.49856		97.8669	2.13307	0	0
37	4	706907697	7669336	136721	27758	6350511860	64774663	32949061		59.5	0.991667	193.091	2.09487	0.0373452	0.00758207	578.212	5.89771	1		74.8585	0.81215	0.0144782	0.00293945	224.164	2.28645		75.274	2.14523	0.038243	0.00776434	2.23725		0.846985	2.64142		97.1713	2.76928	0.0493679	0.010023
38	5	701308547	9112607	173744	45714	6335734221	81059535	33057879		74.5	1.24167	190.931	2.48091	0.0473018	0.0124456	574.967	7.35615	1		74.0211	0.96181	0.0183382	0.00482498	222.906	2.85187		74.727	2.67387	0.0509809	0.0134137	2.80266		1.00814	2.78004		96.4652	3.4517	0.0658114	0.0173157
39	6	1387634544	22581918	276864	247818	12635757224	210070008	65656690		97	1.61667	190.212	3.09545	0.0379516	0.0339701	577.356	9.59857	1		73.7425	1.20006	0.0147133	0.0131697	223.832	3.72122		73.8748	3.50896	0.0430213	0.0385079	3.67201		1.25583	2.92398		95.365	4.52971	0.0555362	0.0497099
40	7	1365681600	28140466	368828	470062	12570411898	273894892	65765658		127	2.11667	186.893	3.85101	0.0504739	0.0643278	573.418	12.4941	1		72.4556	1.49298	0.019568	0.0249389	222.306	4.84379		72.8056	4.52481	0.0593052	0.0755829	4.79458		1.58199	3.03072		93.9848	5.84108	0.0765571	0.0975701
41	8	2670366752	71544400	571616	1127672	24971630476	727881732	131222152		172	2.86667	183.15	4.90694	0.0392048	0.0773425	570.901	16.6408	1		71.0044	1.90235	0.0151991	0.0299845	221.33	6.4514		71.2082	6.11186	0.0488317	0.0963342	6.40219		1.99272	3.2128		91.9228	7.88981	0.063037	0.124358
42	9	2591142924	90499384	956764	1982356	24723556280	966562588	130986720		232	3.86667	178.036	6.21815	0.0657385	0.136206	566.246	22.1373	1		69.0217	2.41068	0.0254859	0.0528051	219.525	8.58229		69.1924	8.01263	0.08471	0.175514	8.53308		2.56726	3.3238		89.3206	10.3435	0.109352	0.226571
43	10	4958452088	238941328	2228800	9536752	48784460000	2614975320	261792616		322	5.36667	170.463	8.21441	0.0766225	0.327858	559.043	29.9662	1		66.0861	3.1846	0.0297054	0.127106	216.733	11.6174		66.4156	10.5311	0.0982324	0.420324	11.5682		3.49823	3.30689		85.736	13.5946	0.126808	0.542596
44	11	4670492264	311257320	4004152	21359528	47889115056	3475025472	261749648		442	7.36667	160.59	10.7023	0.137679	0.734426	548.873	39.8284	1		62.2584	4.14911	0.053376	0.284726	212.79	15.4409		63.1521	13.2347	0.170258	0.908213	15.3917		4.82532	3.18978		81.5231	17.0847	0.219786	1.17241
45	12	8580525672	816696568	14099544	80623336	93586609840	9398213400	526869632		622	10.3667	146.573	13.9508	0.240849	1.37721	532.883	53.5135	1		56.8241	5.40853	0.0933735	0.533924	206.591	20.7464		58.7166	16.8001	0.290039	1.65849	20.6972		6.66312	3.10623		75.7973	21.6873	0.374412	2.14095
46	13	7657606680	1051607056	23848072	160467296	90786056440	12432220384	527474728		862	14.3667	130.657	17.943	0.406906	2.73796	516.344	70.708	1		50.6539	6.95622	0.157751	1.06147	200.179	27.4124		53.6532	20.2609	0.459472	3.09167	27.3632		9.39466	2.91264		69.261	26.1549	0.593133	3.99104
47	14	6827739872	1275715520	37754400	234514800	88246077360	15203333256	528511744		1102	18.3667	116.269	21.7241	0.642918	3.99354	500.913	86.2989	1		45.0759	8.42211	0.24925	1.54824	194.196	33.4568		49.0547	23.4135	0.692917	4.30411	33.4076		12.0171	2.78001		63.3248	30.2246	0.894487	5.55618
48	15	6099463128	1472588064	52184920	322617296	86210513392	17844429120	529781592		1342	22.3667	103.618	25.0165	0.886524	5.48067	488.185	101.048	1		40.1713	9.69853	0.343692	2.12477	189.262	39.1747		44.9388	25.9275	0.918806	5.68023	39.1255		14.6355	2.67334		58.0115	33.4698	1.18609	7.33262
49	16	5457982616	1659852536	72920016	422206160	84406763056	20312045576	529870904		1582	26.3667	92.7053	28.193	1.23857	7.17129	477.891	115.002	1		35.9405	10.93	0.480174	2.7802	185.271	44.5845		41.2506	27.894	1.22543	7.09522	44.5353		17.4508	2.55205		53.2505	36.0084	1.58191	9.15923
50	17	4896179208	1823584424	94830632	532870760	82870003344	22604196016	530860072		1822	30.3667	83.008	30.9164	1.60772	9.03409	468.316	127.741	1		32.181	11.9858	0.62329	3.50238	181.559	49.5233		38.0773	29.3019	1.52377	8.56232	49.4741		20.2372	2.44471		49.154	37.8258	1.96703	11.0531
51	18	4398894744	1936093544	116439032	635422568	81179838920	24585694096	531046480		2062	34.3667	74.551	32.8123	1.97337	10.7689	458.603	138.89	1		28.9023	12.7208	0.765046	4.17495	177.794	53.8456		35.4275	30.2792	1.82103	9.93758	53.7964		22.6008	2.38028		45.7334	39.0874	2.35077	12.8284
52	19	3969364776	2041647456	138945736	748983624	79742293544	26356674736	531907080		2302	38.3667	67.1626	34.5452	2.351	12.673	449.753	148.654	1		26.038	13.3927	0.911446	4.91313	174.363	57.6309		33.2768	30.7954	2.0958	11.2974	57.5817		25.0418	2.29942		42.957	39.7538	2.70547	14.5838
54	20	3166641768	2214321704	192118232	1029193680	77127111104	30051412496	527830872		2782	46.3667	53.9941	37.7562	3.27579	17.5487	438.363	170.801	1		20.9327	14.6375	1.26998	6.80337	169.947	66.2172		28.6503	31.4621	2.7297	14.6232	66.1679		30.7842	2.14941		36.9847	40.6144	3.52377	18.8772
56	21	2609848216	2292167952	239753240	1273324600	75025454864	32806309656	516240072		3262	54.3667	45.4994	39.9611	4.1798	22.1988	435.992	190.646	1		17.6395	15.4923	1.62045	8.60615	169.027	73.9105		24.6177	31.8338	3.32971	17.684	73.8613		35.9455	2.05481		31.7791	41.0943	4.29833	22.8283
57	22	2373442080	2316531344	262542536	1397153200	74058321096	33974918088	508693512		3502	58.3667	41.9918	40.985	4.645	24.719	436.756	200.366	1		16.2796	15.8893	1.8008	9.58318	169.324	77.6788		22.6964	31.9081	3.61628	19.2445	77.6296		38.6572	2.00815		29.2988	41.1902	4.66826	24.8427
										t, min	t, h

## Sheet: I_C#
mm210215
		TA, mg	15
Triacetin+HPC#		H2O, mg	895.5
		TSP, mg	306
		aliq., mg	572.9
		HPC, mg	48.8
		TSP, mkM/g	3.3156
		TSP, mkM	0.477805
		Σm	621.7
		TSP, mkM/g	0.768545
		Integrals
	ppm	5.3033	5.1037	4.966	3.9723	2.1351	1.9595	0			ppm	5.3033	5.1037	4.966	3.9723	2.1351	1.9595	0		5.3033	5.1037	4.966	3.9723	2.1351	1.9595		5.3033	5.1037	4.966	3.9723	1.9595					5.3033	5.1037	4.966	3.9723
	H	1	1	1	1	3	3	9				I rel.								C*, mkM/g							C, mkM/g									C, %
№ sp.	№	TA	1,2-DA	2-MA	1-MA	Ac(A)	Ac	TSP		t, min	t, h	TA	1,2-DA	2-MA	1-MA	Ac(A)	Ac	TSP		TA	1,2-DA	2-MA	1-MA	Ac(A)	Ac		TA	1,2-DA	2-MA	1-MA	Ac		Ac(Σ)	k(/)Ac		TA	1,2-DA	2-MA	1-MA
93	1	875274005	1370730	0	0	7699776948	8130197	113899795		0	0	69.1614	0.108311	0	0	202.804	0.214141	1		53.1536	0.0832417	0	0	155.864	0.164577		53.1536	0.0832417	0	0	0.0832417		0.0832417	1		99.8436	0.156361	0	0
95	2	1650366754	41530774	0	200312	15144693932	296269614	229798636		36	0.6	64.6362	1.62654	0	0.00784516	197.713	3.86777	1		49.6758	1.25007	0	0.00602936	151.951	2.97256		50.3595	2.8636	0	0.0138118	2.89122		1.26213	2.29075		94.5951	5.37898	0	0.025944
96	3	10491509040	1021580320	16807040	57899168	113442496960	10549502176	1843908416		175	2.91667	51.2084	4.98627	0.0820341	0.282602	184.569	17.1638	1		39.356	3.83217	0.0630469	0.217193	141.849	13.1912		40.9634	11.4371	0.188163	0.648209	13.1098		4.39265	2.98449		76.9456	21.4834	0.353445	1.21759
97	4	6772225704	1849985840	70745048	417941136	101488539864	21734691672	1848759080		415	6.91667	32.9681	9.00597	0.344396	2.03459	164.686	35.2691	1		25.3375	6.9215	0.264684	1.56368	126.569	27.1059		30.8833	17.6826	0.676198	3.99478	27.0246		10.5782	2.55474		58.0111	33.215	1.27017	7.50379
98	5	4238622664	2307203856	148111104	996481232	92299561648	31037251296	1849393160		655	10.9167	20.6271	11.2279	0.720777	4.84934	149.724	50.3472	1		15.8529	8.62916	0.55395	3.72693	115.07	38.6941		24.2395	19.3821	1.24423	8.37111	38.6128		17.1909	2.24611		45.5313	36.4072	2.33716	15.7243
99	6	2580392032	2507493232	245848368	1731133840	85367039936	38542738088	1855571352		895	14.9167	12.5156	12.162	1.19243	8.39645	138.017	62.3141	1		9.61878	9.34704	0.916435	6.45305	106.073	47.8912		20.0552	18.5535	1.81909	12.8091	47.8098		24.086	1.98496		37.6716	34.8509	3.41697	24.0605
100	7	1545198880	2535128944	348676952	2473732824	79936509864	44354637968	1858107520		1135	18.9167	7.48438	12.2792	1.68886	11.9819	129.061	71.6126	1		5.75209	9.43716	1.29797	9.20861	99.1893	55.0375		17.2428	17.032	2.34255	16.6195	54.9562		30.4503	1.80478		32.3888	31.9929	4.40024	31.2181
101	8	920545704	2456597496	451072808	3247332968	75520286016	48618404976	1860269000		1375	22.9167	4.45361	11.885	2.18229	15.7106	121.789	78.4054	1		3.4228	9.13419	1.67719	12.0743	93.6006	60.2581		15.647	15.0029	2.75479	19.8321	60.1768		36.6372	1.6425		29.3913	28.1815	5.1746	37.2526
102	9	553208880	2330696120	543302296	3946323920	71943574816	52757037000	1864785144		1615	26.9167	2.66995	11.2486	2.62214	19.0461	115.74	84.8736	1		2.05198	8.64507	2.01523	14.6378	88.9516	65.2292		13.9503	13.4253	3.12955	22.7317	65.1479		41.9511	1.55295		26.2041	25.2181	5.87853	42.6992
103	10	341182832	2180137680	628902224	4595426432	68935578624	56151513184	1865607936		1855	30.9167	1.64592	10.5173	3.03393	22.1691	110.852	90.2947	1		1.26497	8.08305	2.33171	17.038	85.1949	69.3956		12.5968	11.9659	3.45178	25.2224	69.3142		46.8224	1.48037		23.6618	22.4767	6.48382	47.3777
104	11	209409424	2025111952	709208080	5196243744	66322555984	58950755296	1867184400		2095	34.9167	1.00937	9.76123	3.41845	25.0464	106.56	94.716	1		0.775748	7.50194	2.62723	19.2493	81.8964	72.7935		11.5595	10.6425	3.72709	27.3077	72.7122		51.2549	1.41864		21.7133	19.9909	7.00096	51.2948
										t, min	t, h
